# Supplementary material for: Generation of a PAX6 knockout glioblastoma cell line with changes in cell cycle distribution and sensitivity to oxidative stress
Source: Springer Nature journal article supplement (doi:10.1186/s12885-018-4394-6), 2018-05-02
Supplement: MOESM2 [file 15733142]

Figure 2

A

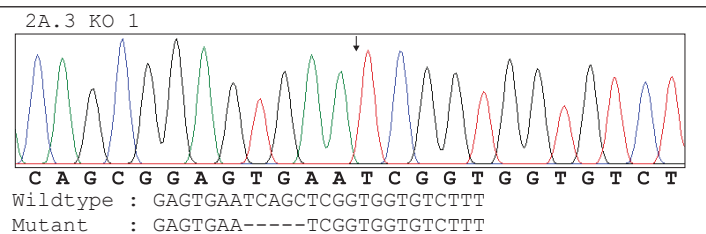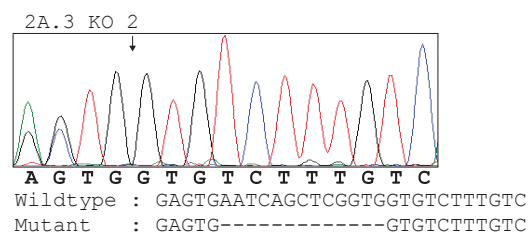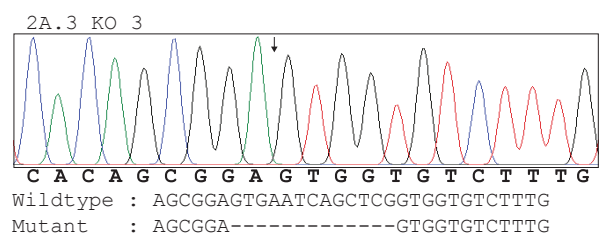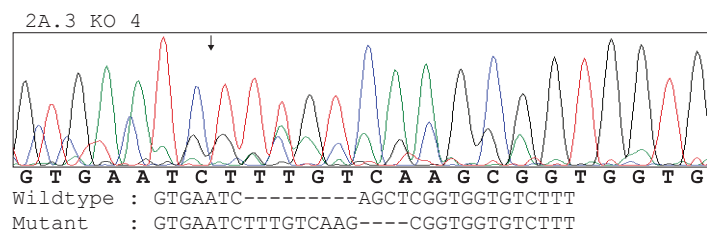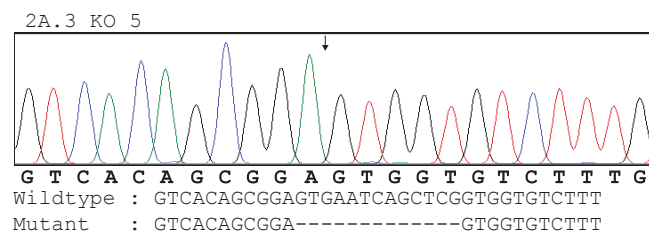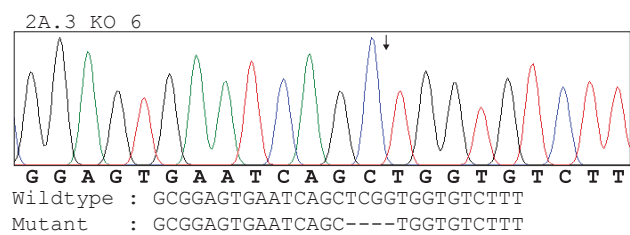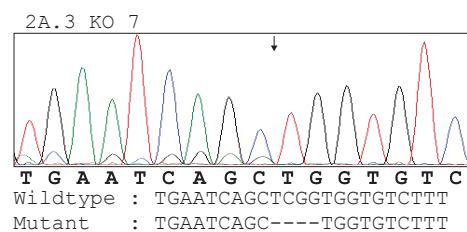

B

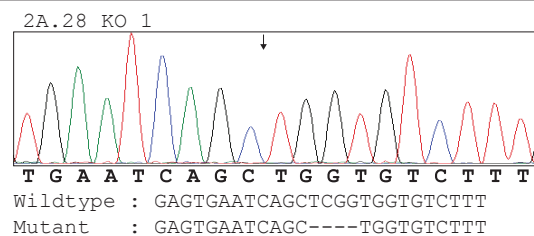

**B**

2A.28 KO 2

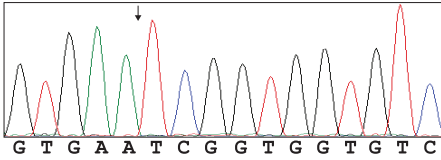

Wildtype : GCGGAGTGAATCAGCTCGGTGGTGTCTTT  
 Mutant : GCGGAGTGAA-----TCGGTGGTGTCTTT

2A.28 KO 3

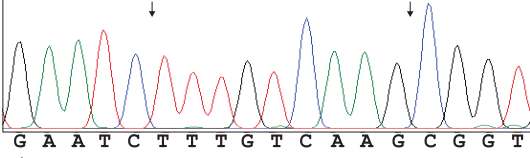

Wildtype : GCGGAGTGAATC-----AGCTCGGTGGTGTCTTT  
 Mutant : GCGGAGTGAATCTTTGTCAAG--CGGTGGTGTCTTT

2A.28 KO 4

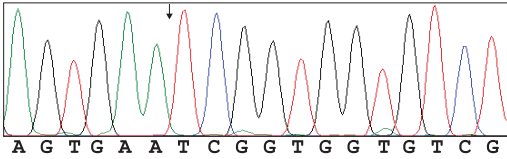

Wildtype : GCGGAGTGAATCAGCTCGGTGGTGTCTTT  
 Mutant : GCGGAGTGAA-----TCGGTGGTGTCTTT

2A.28 KO 5

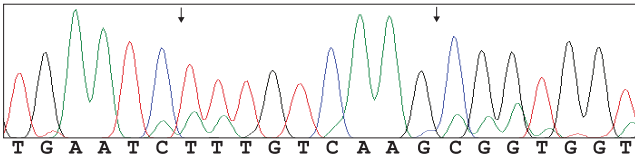

Wildtype : TGAATC-----AGCTCGGTGGT  
 Mutant : TGAATCTTTGTCAAG--CGGTGGT

2A.28 KO 6

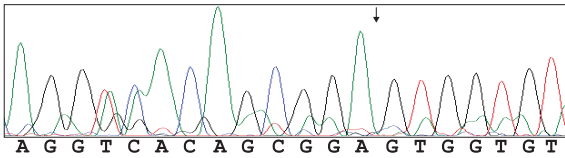

Wildtype : AGGTCACAGCGGAGTGAATCAGCTCGGTGGTGT  
 Mutant : AGGTCACAGCGGA-----GTGGTGT

2A.28 KO 7

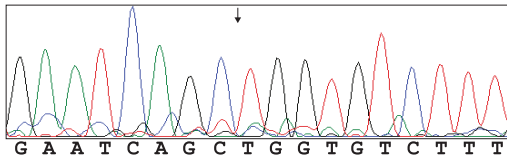

Wildtype : GTGAATCAGCTCGGTGGTGTCTTT  
 Mutant : GTGAATCAGC---TGGTGTCTTT

**C**

2.10 KO 1

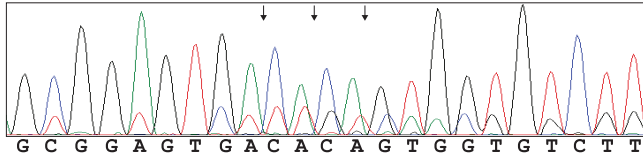

Wildtype : GCGGAGTGAATCAGCTCGGTGGTGTCTTT  
 Mutant : GCGGAGTGA--CA-CA--GTGGTGTCTTT

2.10 KO 2

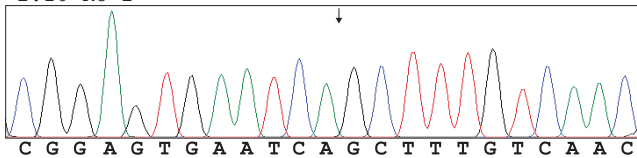

Wildtype : AGCGGAGTGAATCAG-----CTTTGTCAAC  
 Mutant : AGCGGAGTGAATCAGCTCGGTGGTGTCTTTGTCAAC

C

2.10 KO 3

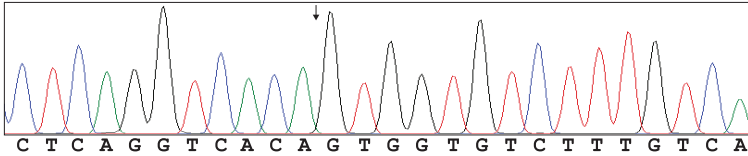

Wildtype : CTCAGGTCACAGCGGAGTGAATCAGCTCGGTGGTGTCTTT  
Mutant : CTCAGGTCACA-----GTGGTGTCTTT

2.10 KO 4

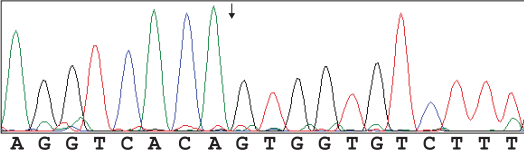

Wildtype : CTCAGGTCACAGCGGAGTGAATCAGCTCGGTGGTGTCTTT  
Mutant : CTCAGGTCACA-----GTGGTGTCTTT

2.10 KO 5

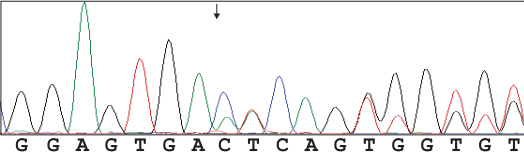

Wildtype : GCGGAGTGAATCAGCTCGGTGGTGTCTTT  
Mutant : GCGGAGTGA-----CTCAGTGGTGTCTTT

2.10 KO 6

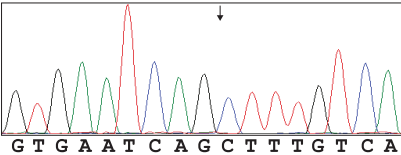

Wildtype : GAGTGAATCAGCTCGGTGGTGTCTTTGTC  
Mutant : GAGTGAATCAG-----CTTTGTC
